# Supplementary material for: Suppression of ERK signalling abolishes primitive endoderm formation but does not promote pluripotency in rabbit embryo
Source: Oxford University Press journal article supplement (doi:10.1242/dev.156406), 2017-09-22
Supplement: dev156406supp.pdf [file dev156406supp.pdf]

## Supplementary tables

Table S1. Primer pairs and real-time PCR reaction conditions

| <i>GENE</i>  | Sense primer                   | Antisense primer        | Annealing temp | Product size(bp) |
|--------------|--------------------------------|-------------------------|----------------|------------------|
| <i>HPRT1</i> | CAGGACTGAAAGGCTTGCTC           | AATCCAGCAGGTCAGCAAAG    | 62             | 110              |
| <i>H2AFZ</i> | GCCATCCTGGAGTACCTCAC           | AGCAAGTTGCAAATGACGAG    | 62             | 102              |
| <i>YWHAZ</i> | GGTCTGGCCCTTAACCTTCTCTGTGTTCTA | GCGTGCTGTCTTTGTATGATTCT | 62             | 142              |
| <i>NANOG</i> | AGACAGAAATACCTCAGCCTTCA        | AATTGTTTCTCTGCCACCTCTTA | 60             | 127              |
| <i>GATA6</i> | TGCGGCATCTACAGCAAGAT           | TTCTGCGCCATAAGGTGGT     | 66             | 134              |
| <i>FGF4</i>  | GGCGTGGTGAGCATCTTT             | TACCTGTGGGACTCGTAGGC    | 67             | 152              |
| <i>FGFR1</i> | TTGCCTGAACAAGATGCGCT           | CTACGGGCTTACGGTTTGGT    | 58             | 109              |
| <i>FGFR2</i> | ACGTTCAAGCAGTTGGTGG            | CCTGAAAGAAGGGAAGAGAGACG | 60             | 151              |

Table S2. List of antibodies used in this study

| Primary antibody                                                                                       | host   | company     | Catalog number | dilution |
|--------------------------------------------------------------------------------------------------------|--------|-------------|----------------|----------|
| anti-SOX2                                                                                              | rabbit | Abcam       | ab97959        | 1:100    |
| anti-SOX2                                                                                              | mouse  | R&D systems | SC009 (kit)    | 1:100    |
| anti-GATA6                                                                                             | goat   | R&D Systems | AF1700         | 1:100    |
| anti-SOX17                                                                                             | goat   | R&D Systems | AF1924         | 1:100    |
| anti-SOX17                                                                                             | goat   | R&D Systems | NL557          | 1:100    |
| anti-NANOG                                                                                             | rabbit | Peptotech   | #500-P236      | 1:100    |
| anti-NANOG                                                                                             | rabbit | Cosmo Bio   | RCAB0001P      | 1:500    |
| Secondary antibodies (Alexa Fluor) were purchased from Invitrogen or Abcam and used at 1:500 dilution. |        |             |                |          |

Table S3. Staging of preimplantation rabbit embryos

| Stage | Cell number | Time post fertilisation | Morphology                               |
|-------|-------------|-------------------------|------------------------------------------|
| I     | 2           | 16-22 hpc               | 2-cell stage                             |
| II    | 4           | 21-30 hpc               | 4-cell stage                             |
| III   | 8           | 1-1.5 dpc               | 8-cell stage                             |
| IV    | 16-31       | 1.5-2.5 dpc             | morula                                   |
| V     | 32-63       | 2.5-3.25 dpc            | morula                                   |
| VI    | 64-127      | 3.0-3.5 dpc             | compact morula/<br>cavitating blastocyst |
| VII   | 128-255     | 3.0-3.75 dpc            | blastocyst                               |
| VIII  | 256-511     | 3.25-3.75 dpc           | blastocyst                               |
| IX    | 512-1023    | 3.5-4.25 dpc            | blastocyst                               |
| X     | >1024       | 3.75-4.25 dpc           | blastocyst                               |

## SUPPLEMENTARY FIGURES

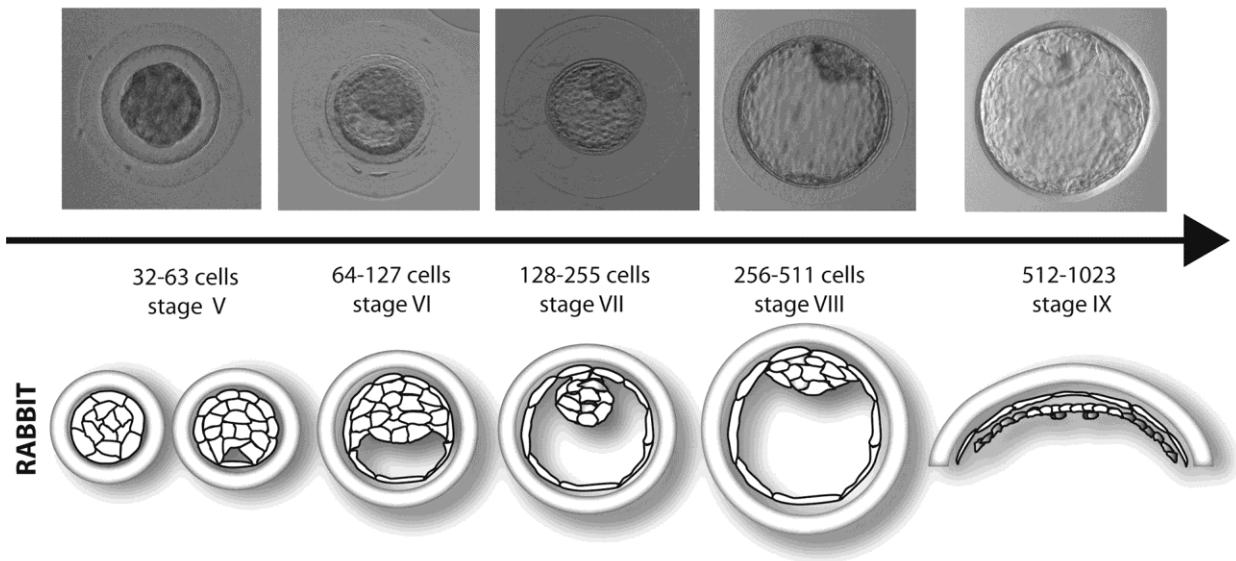

**Fig. S1**

**Development of rabbit embryos during epiblast and primitive endoderm specification, and proposed staging system.**

Upper row – single optical section, bright field images of rabbit embryos. Lower row – schematic representation of corresponding stages of rabbit embryo development.

Embryos not to scale.

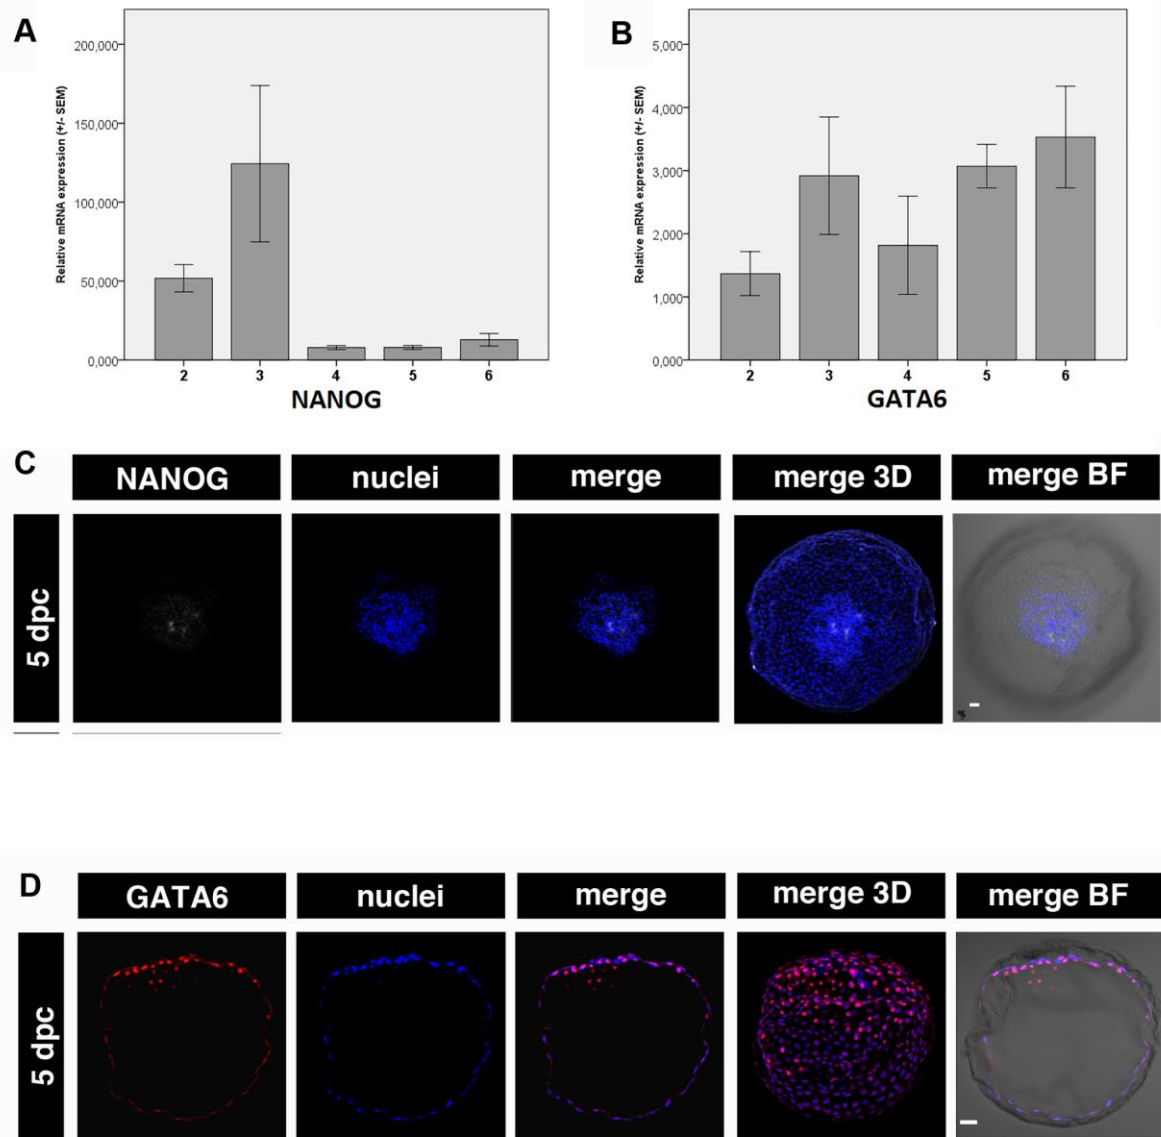

**FIG. S2**

(A-B) Expression levels of (A) *NANOG* and (B) *GATA6* in rabbit embryos at consecutive stages of development (2 - 6 dpc). Error bars represent SEM.

(C) *NANOG* and (D) *GATA6* distribution in rabbit embryos at 5 dpc. Arrowheads indicate *NANOG*-positive cells. Each row represents a single optical section of one embryo. BF, bright field; white, *NANOG*; blue, Hoechst (nuclear marker). Scale bar: 50  $\mu\text{m}$ .

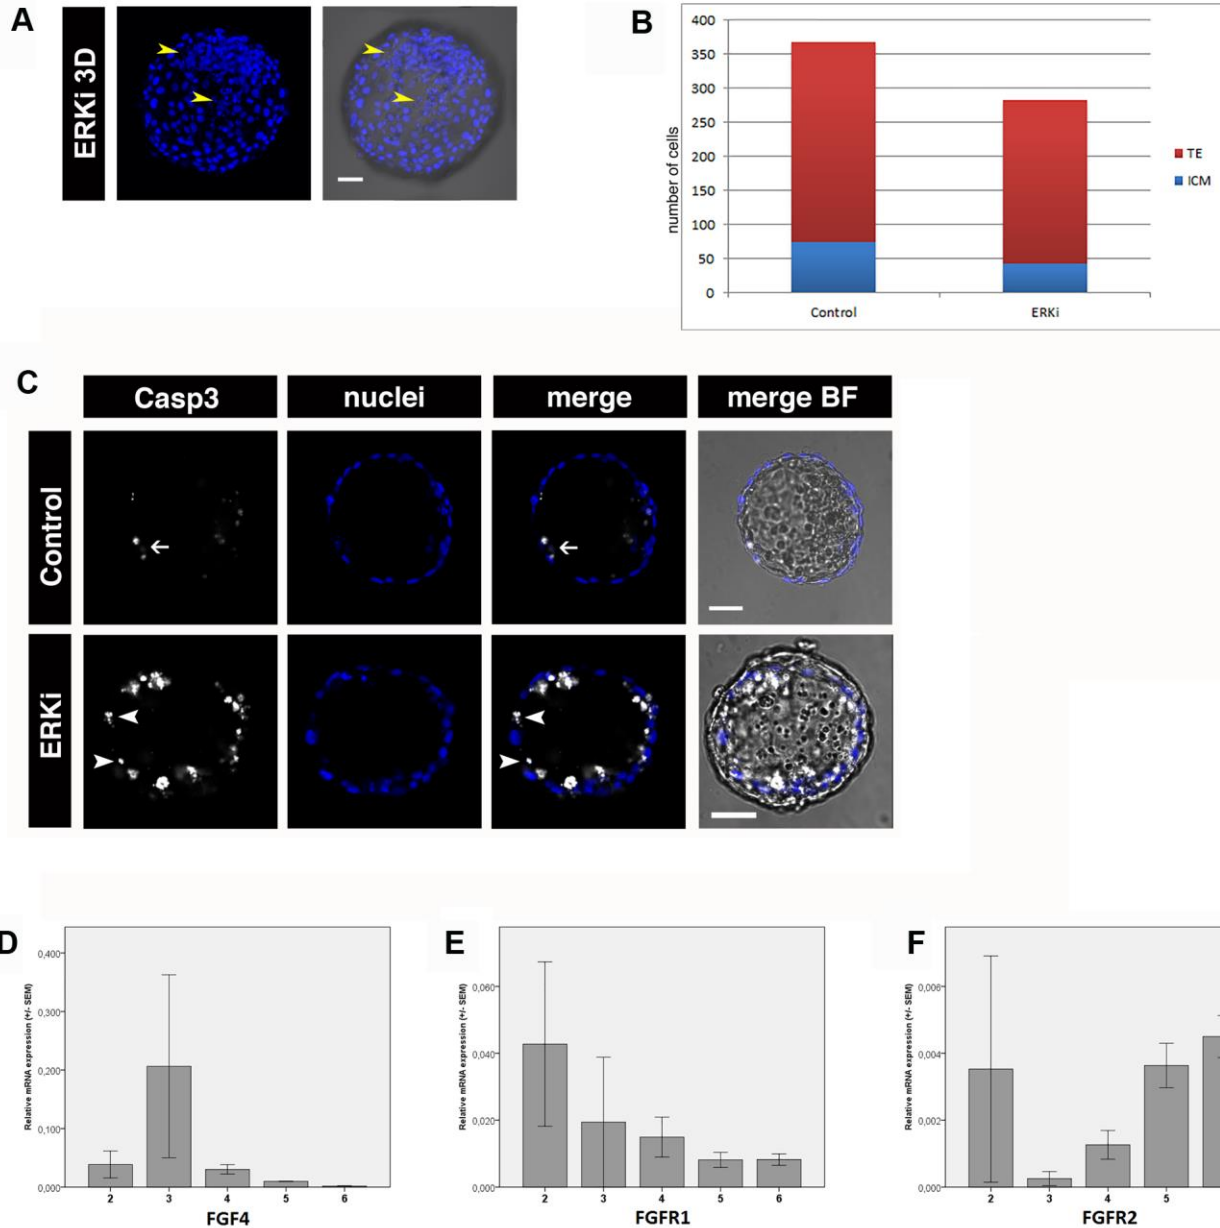

**Fig. S3**

(A) ERKi-treated embryos exhibit pronounced ICM cell death. Arrowhead marks cells undergoing nuclear fragmentation. BF, bright field; blue, Hoechst (nuclear marker). Scale bar: 50  $\mu$ m.

(B) Differences in mean cell number and lineage contribution in control and ERKi treated rabbit embryos. TE (red) and ICM (blue).

(C) Cleaved Caspase 3 activity in control and ERKi-treated rabbit embryos. Each row represents a single optical section of one embryo. Arrowheads indicate caspase-positive cells. Arrows indicate apoptotic cell debris. BF, bright field; white, cleaved caspase 3; blue, Hoechst (nuclear marker). Scale bar: 50  $\mu$ m.

(D-F) Expression levels of (D) *FGF4*, (E) *FGFR1* and (F) *FGFR2* in rabbit embryos at consecutive stages of development (E2.0 to E6.0) Error bars represent standard error of the mean (SEM).
